1 Phylogenetic analysis of West Nile Virus in Maricopa County, Arizona: Evidence for dynamic behavior of  
2 strains in two major lineages in the American Southwest

3

4 Crystal M. Hepp<sup>1,2\*</sup>, Jill Hager Cocking<sup>1,2</sup>, Michael Valentine<sup>3</sup>, Steven J. Young<sup>5</sup>, Dan Damien<sup>4</sup>, Krystal  
5 Sheridan<sup>2,3</sup>, Viacheslav Y. Fofanov<sup>1,2</sup>, Joseph D. Busch<sup>2</sup>, Daryn E. Erickson<sup>1,2</sup>, Ryan C. Lancione<sup>1,2</sup>, Kirk  
6 Smith<sup>5</sup>, James Will<sup>5</sup>, John Townsend<sup>5</sup>, Paul S. Keim<sup>2,3</sup>, David M. Engelthaler<sup>3</sup>

7

8 **1** School of Informatics, Computing, and Cyber Systems, Northern Arizona University, Flagstaff, Arizona,  
9 United States of America

10 **2** The Pathogen and Microbiome Institute, Northern Arizona University, Flagstaff, Arizona, United States  
11 of America

12 **3** Translational Genomics Research Institute North, Flagstaff, Arizona, United States of America.

13 **4** Maricopa County Environmental Services Department Office of Enterprise Technology, Phoenix,  
14 Arizona, United States of America

15 **5** Maricopa County Environmental Services Department Vector Control Division, Phoenix, Arizona,  
16 United States of America

17

18 \*Corresponding Author

19 E-mail: crystal.hepp@nau.edu

20 **Abstract**

21 West Nile Virus (WNV) has been detected annually in Maricopa County, Arizona, since 2003. With this in  
22 mind, we sought to determine if contemporary strains are established within the county or are annually  
23 imported. As part of this effort, we developed a new protocol for tiled amplicon sequencing of WNV to  
24 efficiently attain greater than 99% coverage of 14 WNV genomes collected directly from positive  
25 mosquito pools distributed throughout Maricopa County between 2014 and 2017. Bayesian  
26 phylogenetic analyses revealed that the contemporary genomes fall within two major lineages,  
27 NA/WN02 and SW/WN03. We found that all of the Arizona strains possessed a mutation known to be  
28 under positive selection (NS5-K314R), which has arisen independently four times. The SW/WN03 strains  
29 exhibited transient behavior, with at least 10 separate introductions into Arizona when considering both  
30 historical and contemporary strains. However, NA/WN02 strains are geographically differentiated and  
31 appear to be established in Arizona, with likely origins in New York. The clade of New York and Arizona  
32 strains looks to be the most ancestral extant lineage of WNV still circulating in the United States. The  
33 establishment of WNV strains in Maricopa County provides the first evidence of local overwintering by a  
34 WNV strain over the course of several years in Arizona.

35

## 36 Introduction

37 The first human cases of West Nile Virus (WNV) were identified in New York City during the summer of  
38 1999. This mosquito-borne virus belongs to the Japanese encephalitis complex (genus *Flavivirus*) and  
39 became well established throughout the United States by 2004. Over a decade later, WNV is still the  
40 most important arbovirus nationwide, causing 95% of arboviral diseases reported to the Centers for  
41 Disease Control and Prevention (CDC) [1]. The remaining cases are caused by: La Crosse virus, St. Louis  
42 encephalitis virus, Jamestown Canyon virus, Powassan virus, eastern equine encephalitis virus,  
43 unspecified California serogroup virus, and Cache Valley virus [1]. From 1999-2015 there have been  
44 approximately 43,937 human cases and 1,911 deaths associated with WNV infections reported to the  
45 CDC [2]. Of those cases, nearly 18% (n=7,764) have occurred in the southwestern states of Nevada,  
46 California, Utah, and Arizona [1]. Maricopa County, the most populous county in Arizona, and the 4<sup>th</sup>  
47 most populous county in the United States, detected its first WNV-positive bird (*Passer domesticus* –  
48 House sparrow) in September 2003. A positive mosquito pool was detected one week later, followed  
49 shortly thereafter by the first autochthonous human case in November of that same year. Human WNV  
50 cases within Maricopa County peaked dramatically in 2004 with 355 human cases and 14 deaths [3]. A  
51 lesser spike in human infections occurred in 2010, with 155 reported cases. While WNV is not presently  
52 affecting the human population of Maricopa County to the extent it did in 2004 and 2010, the virus has  
53 reliably infected humans in the area each year since its first detection. As of November 17<sup>th</sup>, 2017, there  
54 were already 91 confirmed or probable cases in the county, with 89 of those being neuroinvasive cases,  
55 and 220 positive mosquito pools (74% were *Culex quinquefasciatus* pools) of 10,228 tested across the  
56 Phoenix Metropolitan area [4] (Fig. 1). Given the annual resurgence of WNV in Maricopa County, the  
57 purpose of the study presented here was to answer the following overarching question: Are Maricopa  
58 County WNV populations established residents or are they reintroduced from other foci annually?

## 59 **Materials and Methods**

### 60 *Sample Collection*

61 The Maricopa County Environmental Services Department Vector Control Division conducts year-round  
62 mosquito surveillance and abatement activities throughout Maricopa County. Mosquitoes are collected  
63 once weekly from 787 routine carbon dioxide trap locations distributed throughout the Phoenix  
64 metropolitan area (Fig. 1); collections were subsequently sorted by species and sex. Up to 5 pools of 50  
65 individual female mosquitos are pooled and tested for WNV once weekly, using the protocol described  
66 in Lanciotti et al. [5]. We selected 14 WNV positive mosquito pools, distributed geographically (Fig. 2)  
67 and temporally (from 2014 to 2017, Table S1), for whole genome tiled amplicon sequencing using a  
68 novel protocol, based on the method of Quick et al. [6] developed for Zika virus sequencing.

### 69 *Sample Processing, a new WNV Tiled Amplicon Protocol, and Next Generation Sequencing*

70 Prior to transporting the samples, an equal part of DNA/RNA Shield™ 2X Concentrate (Zymo Research)  
71 was added to each mosquito pool to stabilize the RNA and inactivate WNV. The pools consisted of  
72 mosquitos in approximately 1.3 ml of TE buffer (Invitrogen, AM9858). All mosquito pools were stored at  
73 -80 degrees Celsius prior to extractions. Both DNA and RNA were extracted from the pools in a Biosafety  
74 Cabinet using the Quick DNA/RNA Pathogen Miniprep™ kit (Zymo Research). RNA was reverse  
75 transcribed into cDNA using the protocol as described in Quick et al. [6], and the product was stored at -  
76 20 degrees Celsius.

77 The Primal Scheme primer designer software [6] was used to design the multiplex PCR primers for our  
78 tiled amplicon sequencing protocol. A total of 41 primer pairs with attached universal tails, split into two  
79 pools, were used to amplify regions averaging 372 bases in length, covering the NY99 (NC\_009942.1)  
80 genome positions 8-10877 (Table S2). The preparation of the tiled amplicons was carried out as  
81 described by Colman et al. [7]. For the initial amplification of specific regions of the West Nile Virus  
82 genome, each sample was prepared with two pools of primers. Each of the two PCRs per sample

83 consisted of 12.5  $\mu$ l of KAPA 2G Fast Multiplex PCR Mastermix (Kapa Biosystems, Wilmington, MA),  
84 primers from pool 1 or 2 for a final concentration of 0.2  $\mu$ M each primer, and 2.5  $\mu$ l of cDNA. The PCR  
85 was performed as follows: 3 minutes of denaturation at 95°C, 30 cycles of 95°C for 15 seconds, 60°C for  
86 30 seconds, 72°C for 1 minutes, and a final extension of 72°C for 1 minute. The PCR products were  
87 cleaned using 1X Agencourt AMPure XP beads (Beckman Coulter, Indianapolis, IN). Illumina's sample-  
88 specific index and sequencing adapters were added during a second PCR utilizing the universal tail-  
89 specific primers. This reaction was prepared with 12.5  $\mu$ l of 2X Kapa HiFi HotStart Ready Mix (Kapa  
90 Biosystems), 400 nM of each forward and reverse indexed primer, and 2 or 4  $\mu$ l the cleaned and  
91 amplified WNV product. This PCR was performed as follows: 98°C for 2 minutes, 6 cycles of 98°C for 30  
92 seconds, 60°C for 20 seconds, 72°C for 30 seconds, and finally 72°C for 5 minutes. The indexed PCR  
93 products were again cleaned with 1X Agencourt AMPure XP beads (Beckman Coulter). The amplicon  
94 libraries from each WNV sample were quantified using the Kapa Library Quantification kit (Kapa  
95 Biosystems) and pooled in equal concentrations. Sequencing was carried out on the Illumina Miseq  
96 sequencing platform, using a v2 500 cycle kit.

#### 97 *Sequence Data Processing*

98 Sequencing reads were aligned to the NY99 Lineage 1 WNV genome (NC\_009942.1) using samtools [8]  
99 and Bowtie2 [9]. Alignments were visualized in the Integrative Genomics Viewer (IGV), and all  
100 sequenced positions had at least 100x coverage [10,11]. Consensus sequences were exported from IGV,  
101 where at least 80% of reads at a position had to have the majority allele for a position to be called an A,  
102 T, G, or C. For sites where the majority allele was not represented in at least 80% of the reads at that  
103 position, sites were coded according to the International Union of Pure and Applied Chemistry (IUPAC)  
104 nucleotide codes. The 14 new consensus genomes and associated metadata were deposited into  
105 Genbank using Bankit (Accession numbers: MG004528-MG004541).

#### 106 *Phylogenetic Analysis with an Incorporated Timescale*

107 Using MUSCLE in MEGA7.0 [12], we aligned a total of 246 genomes, including: i) newly sequenced  
108 genomes from this study (n=14); ii) United States-based whole genomes that were included in Pybus et  
109 al. [13] (n=104); iii) Arizona-based genomes that were published in Plante et al. [14] (n=3); iv) Southern  
110 California-based genomes published in Duggal et al. [15] (n=112); and v) New York-based genomes [16]  
111 (n=13) (Table S1). Genomes were selected based on availability of sample metadata, including time and  
112 geolocation of collections, except for the New York genomes from Ehrbar et al., [16], where geolocation  
113 coordinates were not available. To determine if the WNV genomes in those data exhibited a strong  
114 molecular clock signal, we constructed a neighbor joining tree in MEGA7.0 [12] and uploaded the newick  
115 file, with associated collection dates into TempEst [17]. The coefficient of determination revealed that  
116 nearly 90% ( $R^2 = 0.8871$ ) of the variation in root to tip distance can be explained by time. This indicated  
117 that a molecular clock analysis would be appropriate for the dataset.

118 We employed a Bayesian molecular clock method implemented in the BEAST v1.8.0 software  
119 package to estimate evolutionary rates for WNV, as well as divergence times for Arizona lineages, [18].  
120 Substitution model selection was carried out in MEGA 7.0.9 for the 246 genomes included in our  
121 dataset. The corrected Akaike's Information Criterion and Bayesian Criterion results indicated that the  
122 General Time Reversible model with incorporation of a gamma distribution of among-site rate variation  
123 would be the best fitting for the dataset. To determine the best fitting clock and demographic model  
124 combinations for these data, path sampling [19] and stepping stone [20-22] sampling marginal likelihood  
125 estimators were employed to compare the Uncorrelated Lognormal (UCLN) clock model combined with  
126 the Bayesian Skyline model as used in Pybus et al. [13], the Gaussian Markov Random Field Bayesian  
127 Skyride model [23], or the Bayesian Skygrid model [24]. Each of the three model combinations were  
128 iterated 100,000,000 times, where each Markov chain was sampled every 10,000 generations. We found  
129 that the UCLN Bayesian Skyline combination outperformed the other two (Table S3). Using the UCLN  
130 Bayesian Skyline model, we ran three additional chains for 100,000,000 generations, sampling every

131 10,000, and found convergence within and among chains using Tracer v1.6 [25]. We used LogCombiner  
132 to merge the four different chains, discarding the first 10% as burn in (40,000,000 generations), and  
133 then resampled every 36,000 generations. The resulting file was input to TreeAnnotator to produce a  
134 maximum clade credibility tree, and then visualized using FigTree v1.4.3 [26].

### 135 *Defining WNV lineages*

136 The three major lineages of WNV in the United States have been defined by two nonsynonymous  
137 mutations (E-V159A, NS4A-A85T) within the polyprotein, and we have identified the locations of these  
138 mutations on the reconstructed phylogeny reported here (S1 Table, Fig. S1). Members of the NY99  
139 lineage, the most ancestral lineage of WNV that entered North America, possess an valine at position  
140 159 of the envelope protein, while nearly all isolates collected after 2002 have an alanine at that  
141 position, and are part of both the North American/WN02 (NA/WN02) and distal Southwestern/WN03  
142 (SW/WN03) lineages [27,28]. The entire SW/WN03 genotype is defined by the NS4A-A85T mutation. The  
143 more distal SW/WN03 taxa additionally possess the NS5-K314R mutation [29], which also independently  
144 arose in a clade of Southern California strains residing within the NA/WN02 lineage (S1 Table and Fig.  
145 S1) [15].

### 146 **Results and Discussion**

147 In an effort to better understand the recent dynamics of West Nile Virus circulation in the Phoenix  
148 metropolitan area of Maricopa County, Arizona, we sequenced 14 genomes, varying in location within  
149 the county (Fig. 2 inset), sampling date (2014-2017), and vector species (S2 Table). We evaluated these  
150 strains in a nationwide context, by performing a Bayesian phylogenetic analysis (Fig. 3, Fig. S1). This  
151 included comparisons to an additional 232 genomes which were distributed throughout the United  
152 States (Fig. 2), in order to estimate: 1) when WNV was first introduced into Maricopa County, AZ, 2) how  
153 many distinct WNV introductions have occurred, 3) if contemporary strains belong to lineages that have  
154 become established in Maricopa County, and 4) the temporal span of such establishment.

155           The phylogeny revealed that WNV strains in Arizona have been genetically diverse, are  
156 represented in both major lineages (NA/WN02 and SW/WN03) that are still circulating in the United  
157 States (Fig. 3 and Fig. S1). The placement of Maricopa County strains within the NA/WN02 and  
158 SW/WN03 lineages was first described in Plante et al. [14], and in agreement with that study, we find  
159 that 11 of the genomes sequenced here belong to the NA/WN02 lineage, while 3 others cluster within  
160 the SW/WN03 lineage.

161           Maricopa County strains interspersed within the SW/WN03 clade exhibit polyphyletic clustering,  
162 and are clustered with strains sampled from California, Colorado, Texas, and New Mexico. This  
163 clustering behavior indicates that the lineage has dispersed extensively throughout the southwestern  
164 United States. Furthermore, the most recent sampling was in 2015, suggesting that this lineage is still in  
165 circulation. The strains belonging to the SW/WN03 lineage were the first to be introduced into Arizona,  
166 during 2002 (mean estimate: 2002.48, 95% CI: 2002.42-2002.99) (Fig. 3 and Fig. S1), and have been  
167 reintroduced on at least nine occasions represented by only one or two strains each time. The  
168 contemporary strains sequenced in this study (MG004533, MG004540, and MG004537) represent two  
169 introductions that are part of a small clade, which includes strains from Southern California and Texas.  
170 This may indicate that the genomic diversity of the SW/WN03 lineage in Arizona has been reduced in  
171 recent years.

172           The NA/WN02 lineage was first detected in Arizona in 2010 [14], and the strain representing the  
173 first detection (KF704158.1) clusters monophyletically with two additional contemporary strains that  
174 were collected in 2014 (MG004529 and MG004539) (Fig. 3 and Fig. S1). The estimates of time to most  
175 recent common ancestor (TMRCA) for those strains indicate that the initial introduction occurred in  
176 2007 (mean estimate: 2007.31, 95%CI: 2005.86-2009.23), three years prior to first detection. While we  
177 find that strains from Arizona are dispersed throughout the tree, 9 of the 14 strains sequenced in this  
178 study clustered monophyletically, with a most recent common ancestor entering Arizona in 2011 (mean



179 estimate: 2011.42, 95%CI: 2010.63-2012.7). This monophyletic clade, which includes strains collected  
180 from 2014 through 2017, is nested within a paraphyletic clade of New York strains that were collected in  
181 2012, and indicates a single introduction into Arizona of the New York lineage. This monophyly and node  
182 dating indicates both a single and recent introduction directly from New York to Arizona, although it is  
183 entirely possible that dispersal, likely avian, was more gradational across the US, albeit never sampled.  
184 The placement of this New York and Arizona clade within a national context revealed that these strains  
185 represent the most ancestral extant strains of WNV in the United States.

186         The monophyletic nature of the nine Maricopa County NA/WN02 strains indicates that, at least  
187 for this lineage, there is most likely a mechanism that allows for viral overwintering in resident birds  
188 and/or *Culex* mosquitoes living in Maricopa County. Komar et al. [30] performed an extensive study in  
189 2010 to identify Arizona-resident avian hosts of WNV. They found that communal roosting house  
190 sparrows (*Passer domesticus*), house finches (*Haemorhous mexicanus*), great-tailed grackles (*Quiscalus*  
191 *mexicanus*), and mourning doves (*Zenaida macroura*) account for the greatest proportion of resident  
192 bird infections. In addition to highly competent resident bird species in Maricopa County, both *Culex*  
193 *tarsalis* and the more abundant *Culex quinquefasciatus* vectors are present year-round in Maricopa  
194 County (Fig. 4). However, more extensive surveillance is needed during the winter season to better  
195 understand which mechanisms support overwintering. Although WNV has not historically displayed  
196 strong geographic clustering [31], the monophyletic clustering of the established Arizona strains is  
197 similar to that of those in Southern California [15]. Collectively, these studies indicate that the American  
198 southwest presents a suitable habitat for WNV to ecologically establish and persist across multiple  
199 years.

200         While the two major lineages of WNV that circulate in the United States exhibit drastically  
201 different behavior with regards to establishment (NA/WN02) or transience (SW/WN03) in Arizona, their  
202 continued regional success is evident in sequence data from contemporary strains. Perhaps the most

203 intriguing result of this study is that despite the diversity of Arizona strains over time, all carry the  
204 nonsynonymous mutation of NS5-K314R. This mutation appears to have arisen in 2001 (mean estimate:  
205 2001.41, 95%CI: 2001.05-2002.18, Fig. S1), in the SW/WN03 lineage, and then independently arose on  
206 three separate occasions; twice in the NA/WN02 lineage and one additional time in the SW/WN03  
207 lineage (Fig. S1). Given that previous selection analyses have identified this mutation as being positively  
208 selected [29,32], we hypothesize that this mutation is important for adaptation to the Arizona  
209 ecosystem, and is at least beneficial to survival in other parts of the southwest United States.

210 **Figure Captions:**

211 **Figure 1:** Distribution of WNV and its vectors across Maricopa County in 2017. The dots represent the  
212 count of individual female *Culex quinquefasciatus* (left), *Culex tarsalis* (center), or WNV positive  
213 mosquito pools (right) at each of 787 carbon dioxide traps distributed primarily throughout the urban  
214 portion of the county. Larger circles indicate a higher density at a particular trap.

215 **Figure 2:** Geographic distribution of WNV strains included in the phylogenetic analysis, except for the  
216 New York strains published in Ehrbar et al., [16] where latitude and longitude coordinates were not  
217 available. Green points indicate publicly available strains while orange points indicate strains that were  
218 sequenced as part of this study. Additional metadata can be found in S1 Table.

219 **Figure 3:** Maximum clade credibility phylogenetic tree reconstructed from 246 nationally distributed  
220 WNV genomes. The gradient squares indicate the phylogenetic position of the NY99 (blue), NA/WN02  
221 (red), and SW/WN03 (orange) clades. Posterior probabilities are represented by the size (larger circles  
222 have higher values) and color (defined by the color legend) of circles at each node. The established clade  
223 in Maricopa County is encompassed by a grey shadow.

224 **Figure 4: Distribution of *Culex* mosquitoes and WNV positive pools in Maricopa County by**  
225 **epidemiological week in 2016.** The first y-axis represents the number of *Culex quinquefasciatus* (purple  
226 bars) and *Culex tarsalis* (green bars) individuals trapped each epidemiological week. The second y-axis

227 represents the number of WNV positive *Culex quinquefasciatus* (purple line) and WNV positive *Culex*  
228 *tarsalis* (green line) mosquito pools trapped each epidemiological week.

229 **S1 Figure:** Tip-labelled maximum clade credibility phylogenetic tree reconstructed from 246 nationally  
230 distributed WNV genomes. Each tip consists of the accession number, vector or host where the strain  
231 was derived, two letter state code (or 4 letter code for location in Mexico), and the date of sampling to  
232 the nearest hundredth of a year. The gradient squares indicates the phylogenetic position of the NY99  
233 (blue), NA/WN02 (red), and SW/WN03 (orange) genotypes. NA/WN02 and SW/WN03 strains are  
234 defined by the E-V195A mutation and the SW/WN03 genotype is defined by the NS4A-A85T mutation.  
235 Clade-defining mutations, as well as convergent mutations, are denoted by stars. Posterior probabilities  
236 are represented by the size (larger circles have higher values) and color (defined by the color legend) of  
237 circles at each node.

#### 238 **Table Captions:**

239 **Table S1:** Sequence metadata. The Genbank accession number, the host or vector mosquito that the  
240 strain was isolated from, the state of isolation, isolation date to the nearest hundredths of a year, major  
241 WNV clade the strain belongs to, clade-defining mutations, and notable convergent mutations are  
242 included. We adopted the host/vector naming scheme as in Pybus et al. [13]: **Hosts:** Ah, *Ardea herodias*  
243 (blue heron); Bj, *Buteo jamaicensis* (red-tailed hawk); Bu, *Bonasa umbellus* (ruffed grouse); Bvs,  
244 *Butorides virescens* (green heron); Cb, *Corvus brachyrhynchos* (common crow); Cc, *Cyanocitta cristata*  
245 (blue jay); Ccs, *Cardinalis cardinalis* (northern cardinal); Cl, *Columba livia* (pigeon); Dc, *Dumetella*  
246 *carolinensis* (catbird); Ec, *Equus caballus* (horse); Fa, *Fulica Americana* (American coot); Hs, *Homo*  
247 *sapiens* (humans); Pc, *Phoenicopterus chilensis* (Chilean flamingo); Ph, *Pica hudsonia* (black-billed  
248 magpie); Pn, *Pica nuttalli* (yellow-billed magpie); Px, *Phalacrocorax sp.* (cormorant); Qq, *Quiscalus*  
249 *quiscula* (common grackle); Zm, *Zenaida macroura* (mourning dove); **Vectors:** Cn, *Culex nigripalpus*  
250 (mosquito); Cp, *Culex pipiens* (mosquito); Cq, *Culex quinquefasciatus* (mosquito); Cs, *Culex*

251 *stigmatosoma* (mosquito); Ct, *Culex tarsalis* (mosquito); Cx, *Culex sp.* (mosquito). Dates were calculated  
252 using the collection dates' corresponding day of the epoch calendar which was then divided by the total  
253 number of days in the year (365). The resulting decimal calculation was then added onto the collection  
254 year to the hundredths place.

255 **Table S2:** Tiled amplicon primer pairs. Primer pairs, the amplification pools to which they belong, primer  
256 lengths, melting temperature (T<sub>m</sub>), GC content, and start and end position in relationship to the NY99  
257 strain are included.

258 **Table S3:** Results from the path and stepping stone sampling analyses.

### 259 **Acknowledgements**

260 Funding for this work was provided by the Arizona Technology Research and Initiative Fund (TRIF).  
261 Computational analyses were carried out using the Northern Arizona University High Performance  
262 Computing Cluster, Monsoon. We thank the Biodefense and Ecology Center and the Public Health and  
263 Clinical Translational Genomics Center, both of which are part of the Pathogen and Microbiome  
264 Institute, for helpful comments and suggestions during presentations of these results.

- 265 1. Krow-Lucal E, Lindsey NP, Lehman J, Fischer M, Staples JE (2017) West Nile Virus and Other Nationally  
266 Notifiable Arboviral Diseases - United States, 2015. MMWR Morb Mortal Wkly Rep 66: 51-55.
- 267 2. CDC (2017) Final Cumulative Maps & Data for 1999–2015.
- 268 3. MCDPH (2007) 2003-2004 WNV Report. Maricopa County Department of Public Health, Division of  
269 Epidemiology
- 270 4. AZDHS (2017) Arizona 2017 West Nile Virus Statistics.
- 271 5. Lanciotti RS, Kerst AJ (2001) Nucleic acid sequence-based amplification assays for rapid detection of  
272 West Nile and St. Louis encephalitis viruses. J Clin Microbiol 39: 4506-4513.
- 273 6. Quick J, Grubaugh ND, Pullan ST, Claro IM, Smith AD, et al. (2017) Multiplex PCR method for MinION  
274 and Illumina sequencing of Zika and other virus genomes directly from clinical samples. Nat  
275 Protocols 12: 1261-1276.
- 276 7. Colman RE, Schupp JM, Hicks ND, Smith DE, Buchhagen JL, et al. (2015) Detection of Low-Level Mixed-  
277 Population Drug Resistance in Mycobacterium tuberculosis Using High Fidelity Amplicon  
278 Sequencing. PLoS ONE 10: e0126626.
- 279 8. Li H, Handsaker B, Wysoker A, Fennell T, Ruan J, et al. (2009) The Sequence Alignment/Map format  
280 and SAMtools. Bioinformatics 25: 2078-2079.
- 281 9. Langmead B, Salzberg SL (2012) Fast gapped-read alignment with Bowtie 2. Nat Meth 9: 357-359.
- 282 10. Robinson JT, Thorvaldsdottir H, Winckler W, Guttman M, Lander ES, et al. (2011) Integrative  
283 genomics viewer. Nat Biotech 29: 24-26.

- 284 11. Thorvaldsdóttir H, Robinson JT, Mesirov JP (2013) Integrative Genomics Viewer (IGV): high-  
285 performance genomics data visualization and exploration. *Briefings in Bioinformatics* 14: 178-  
286 192.
- 287 12. Kumar S, Stecher G, Tamura K (2016) MEGA7: Molecular Evolutionary Genetics Analysis Version 7.0  
288 for Bigger Datasets. *Mol Biol Evol* 33: 1870-1874.
- 289 13. Pybus OG, Suchard MA, Lemey P, Bernardin FJ, Rambaut A, et al. (2012) Unifying the spatial  
290 epidemiology and molecular evolution of emerging epidemics. *Proc Natl Acad Sci U S A* 109:  
291 15066-15071.
- 292 14. Plante JA, Burkhalter KL, Mann BR, Godsey MS, Jr., Mutebi JP, et al. (2014) Co-circulation of West  
293 Nile virus variants, Arizona, USA, 2010. *Emerg Infect Dis* 20: 272-275.
- 294 15. Duggal NK, Reisen WK, Fang Y, Newman RM, Yang X, et al. (2015) Genotype-specific variation in  
295 West Nile virus dispersal in California. *Virology* 485: 79-85.
- 296 16. Ehrbar DJ, Ngo KA, Campbell SR, Kramer LD, Ciota AT (2017) High levels of local inter- and intra-host  
297 genetic variation of West Nile virus and evidence of fine-scale evolutionary pressures. *Infect  
298 Genet Evol* 51: 219-226.
- 299 17. Rambaut A, Lam TT, Max Carvalho L, Pybus OG (2016) Exploring the temporal structure of  
300 heterochronous sequences using TempEst (formerly Path-O-Gen). *Virus Evolution* 2: vew007.
- 301 18. Drummond AJ, Suchard MA, Xie D, Rambaut A (2012) Bayesian phylogenetics with BEAUti and the  
302 BEAST 1.7. *Mol Biol Evol* 29: 1969-1973.
- 303 19. A G, XL M (1998) Simulating normalizing constants: From importance sampling to bridge sampling to  
304 path sampling. *Statistical Science* 13: 163-185.
- 305 20. Xie W, Lewis PO, Fan Y, Kuo L, Chen MH (2011) Improving marginal likelihood estimation for  
306 Bayesian phylogenetic model selection. *Syst Biol* 60: 150-160.
- 307 21. Baele G, Li WL, Drummond AJ, Suchard MA, Lemey P (2013) Accurate model selection of relaxed  
308 molecular clocks in bayesian phylogenetics. *Mol Biol Evol* 30: 239-243.
- 309 22. Baele G, Lemey P, Bedford T, Rambaut A, Suchard MA, et al. (2012) Improving the accuracy of  
310 demographic and molecular clock model comparison while accommodating phylogenetic  
311 uncertainty. *Mol Biol Evol* 29: 2157-2167.
- 312 23. Minin VN, Bloomquist EW, Suchard MA (2008) Smooth skyride through a rough skyline: Bayesian  
313 coalescent-based inference of population dynamics. *Mol Biol Evol* 25: 1459-1471.
- 314 24. Gill MS, Lemey P, Faria NR, Rambaut A, Shapiro B, et al. (2013) Improving Bayesian population  
315 dynamics inference: a coalescent-based model for multiple loci. *Mol Biol Evol* 30: 713-724.
- 316 25. Rambaut A, Suchard MA, Xie D, Drummond AJ (2014) Tracer v1.6.
- 317 26. Rambaut A (2016) FigTree v1.4.3.
- 318 27. Davis CT, Ebel GD, Lanciotti RS, Brault AC, Guzman H, et al. (2005) Phylogenetic analysis of North  
319 American West Nile virus isolates, 2001-2004: evidence for the emergence of a dominant  
320 genotype. *Virology* 342: 252-265.
- 321 28. Ebel GD, Carricaburu J, Young D, Bernard KA, Kramer LD (2004) Genetic and phenotypic variation of  
322 West Nile virus in New York, 2000-2003. *Am J Trop Med Hyg* 71: 493-500.
- 323 29. McMullen AR, May FJ, Li L, Guzman H, Bueno R, Jr., et al. (2011) Evolution of new genotype of West  
324 Nile virus in North America. *Emerg Infect Dis* 17: 785-793.
- 325 30. Komar N, Panella NA, Young GR, Brault AC, Levy CE (2013) Avian hosts of West Nile virus in Arizona.  
326 *Am J Trop Med Hyg* 89: 474-481.
- 327 31. Di Giallonardo F, Geoghegan JL, Docherty DE, McLean RG, Zody MC, et al. (2015) Fluid Spatial  
328 Dynamics of West Nile Virus in the United States: Rapid Spread in a Permissive Host  
329 Environment. *J Virol* 90: 862-872.

330 32. Grinev A, Chancey C, Volkova E, Añez G, Heisey DAR, et al. (2016) Genetic Variability of West Nile  
331 Virus in U.S. Blood Donors from the 2012 Epidemic Season. PLoS Neglected Tropical Diseases 10:  
332 e0004717.

333

334

# *Culex quinquefasciatus*

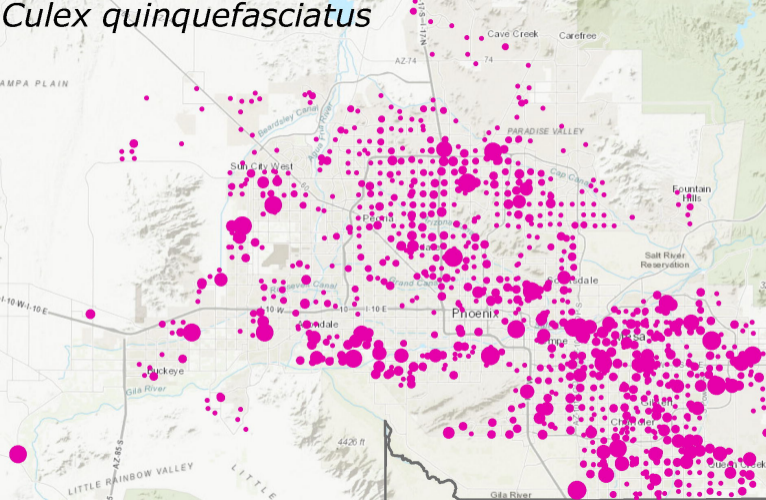

# *Culex tarsalis*

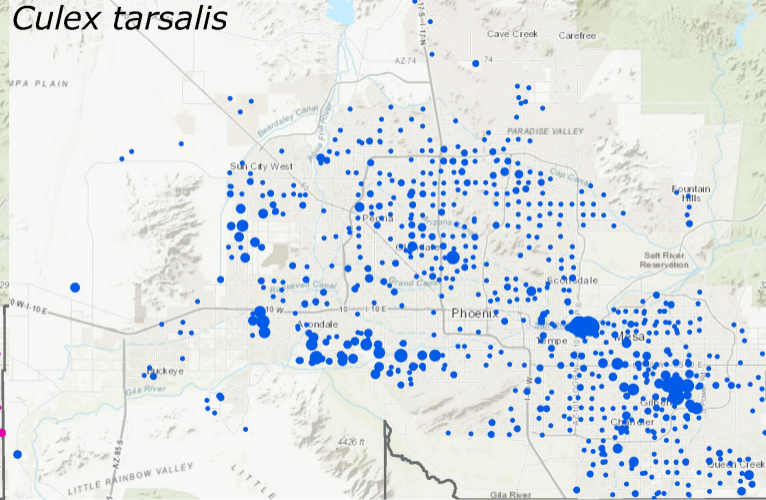

# WNV positive pools

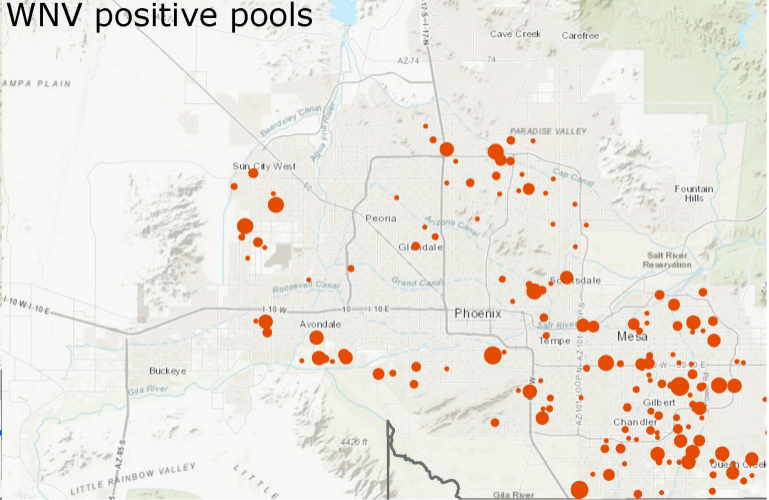

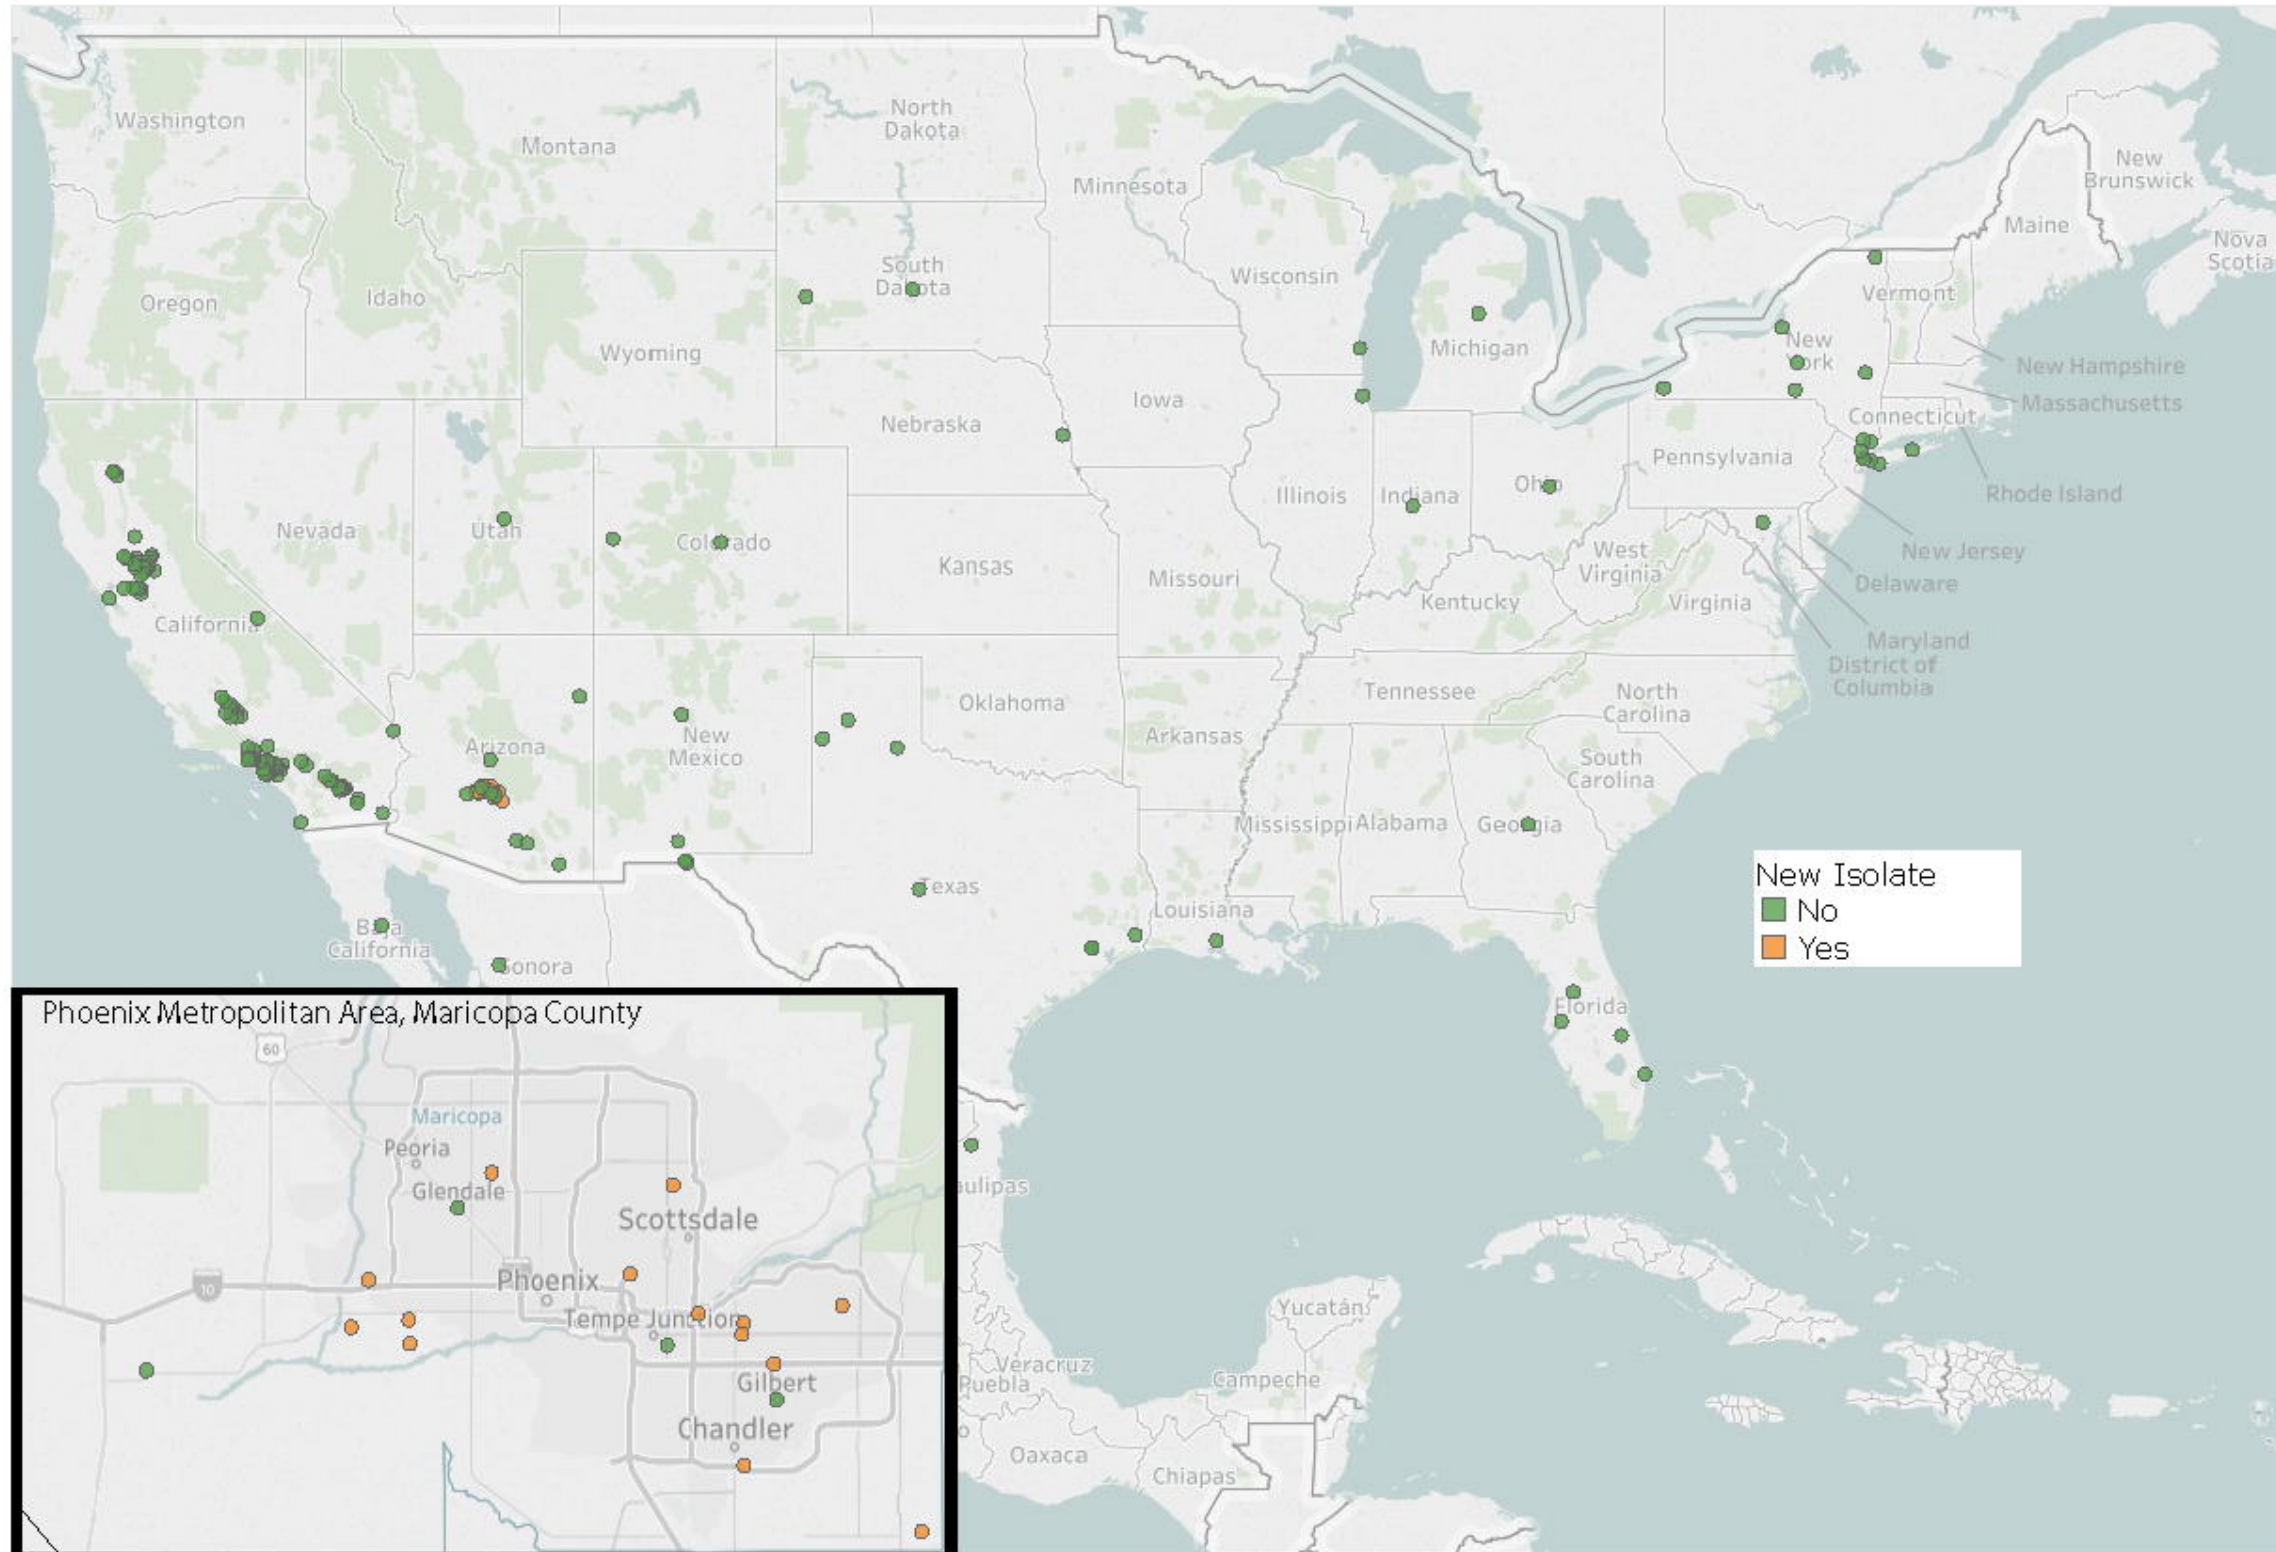



posterior

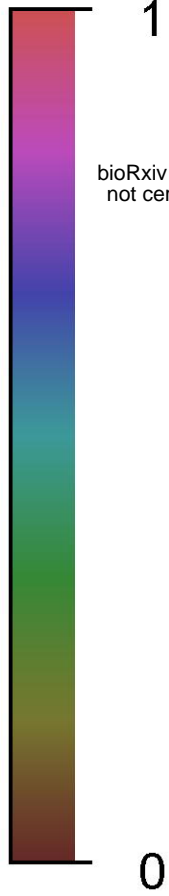

bioRxiv preprint doi: <https://doi.org/10.1101/213503>; this version posted November 22, 2017. The copyright holder for this preprint (which was not certified by peer review) is the author/funder, who has granted bioRxiv a license to display the preprint in perpetuity. It is made available under aCC-BY-NC-ND 4.0 International license.

NY99

WN02

Established in AZ

SW03

Place of Collection

- NY
- AZ
- CA
- Other States

1996 1998 2000 2002 2004 2006 2008 2010 2012 2014 2016

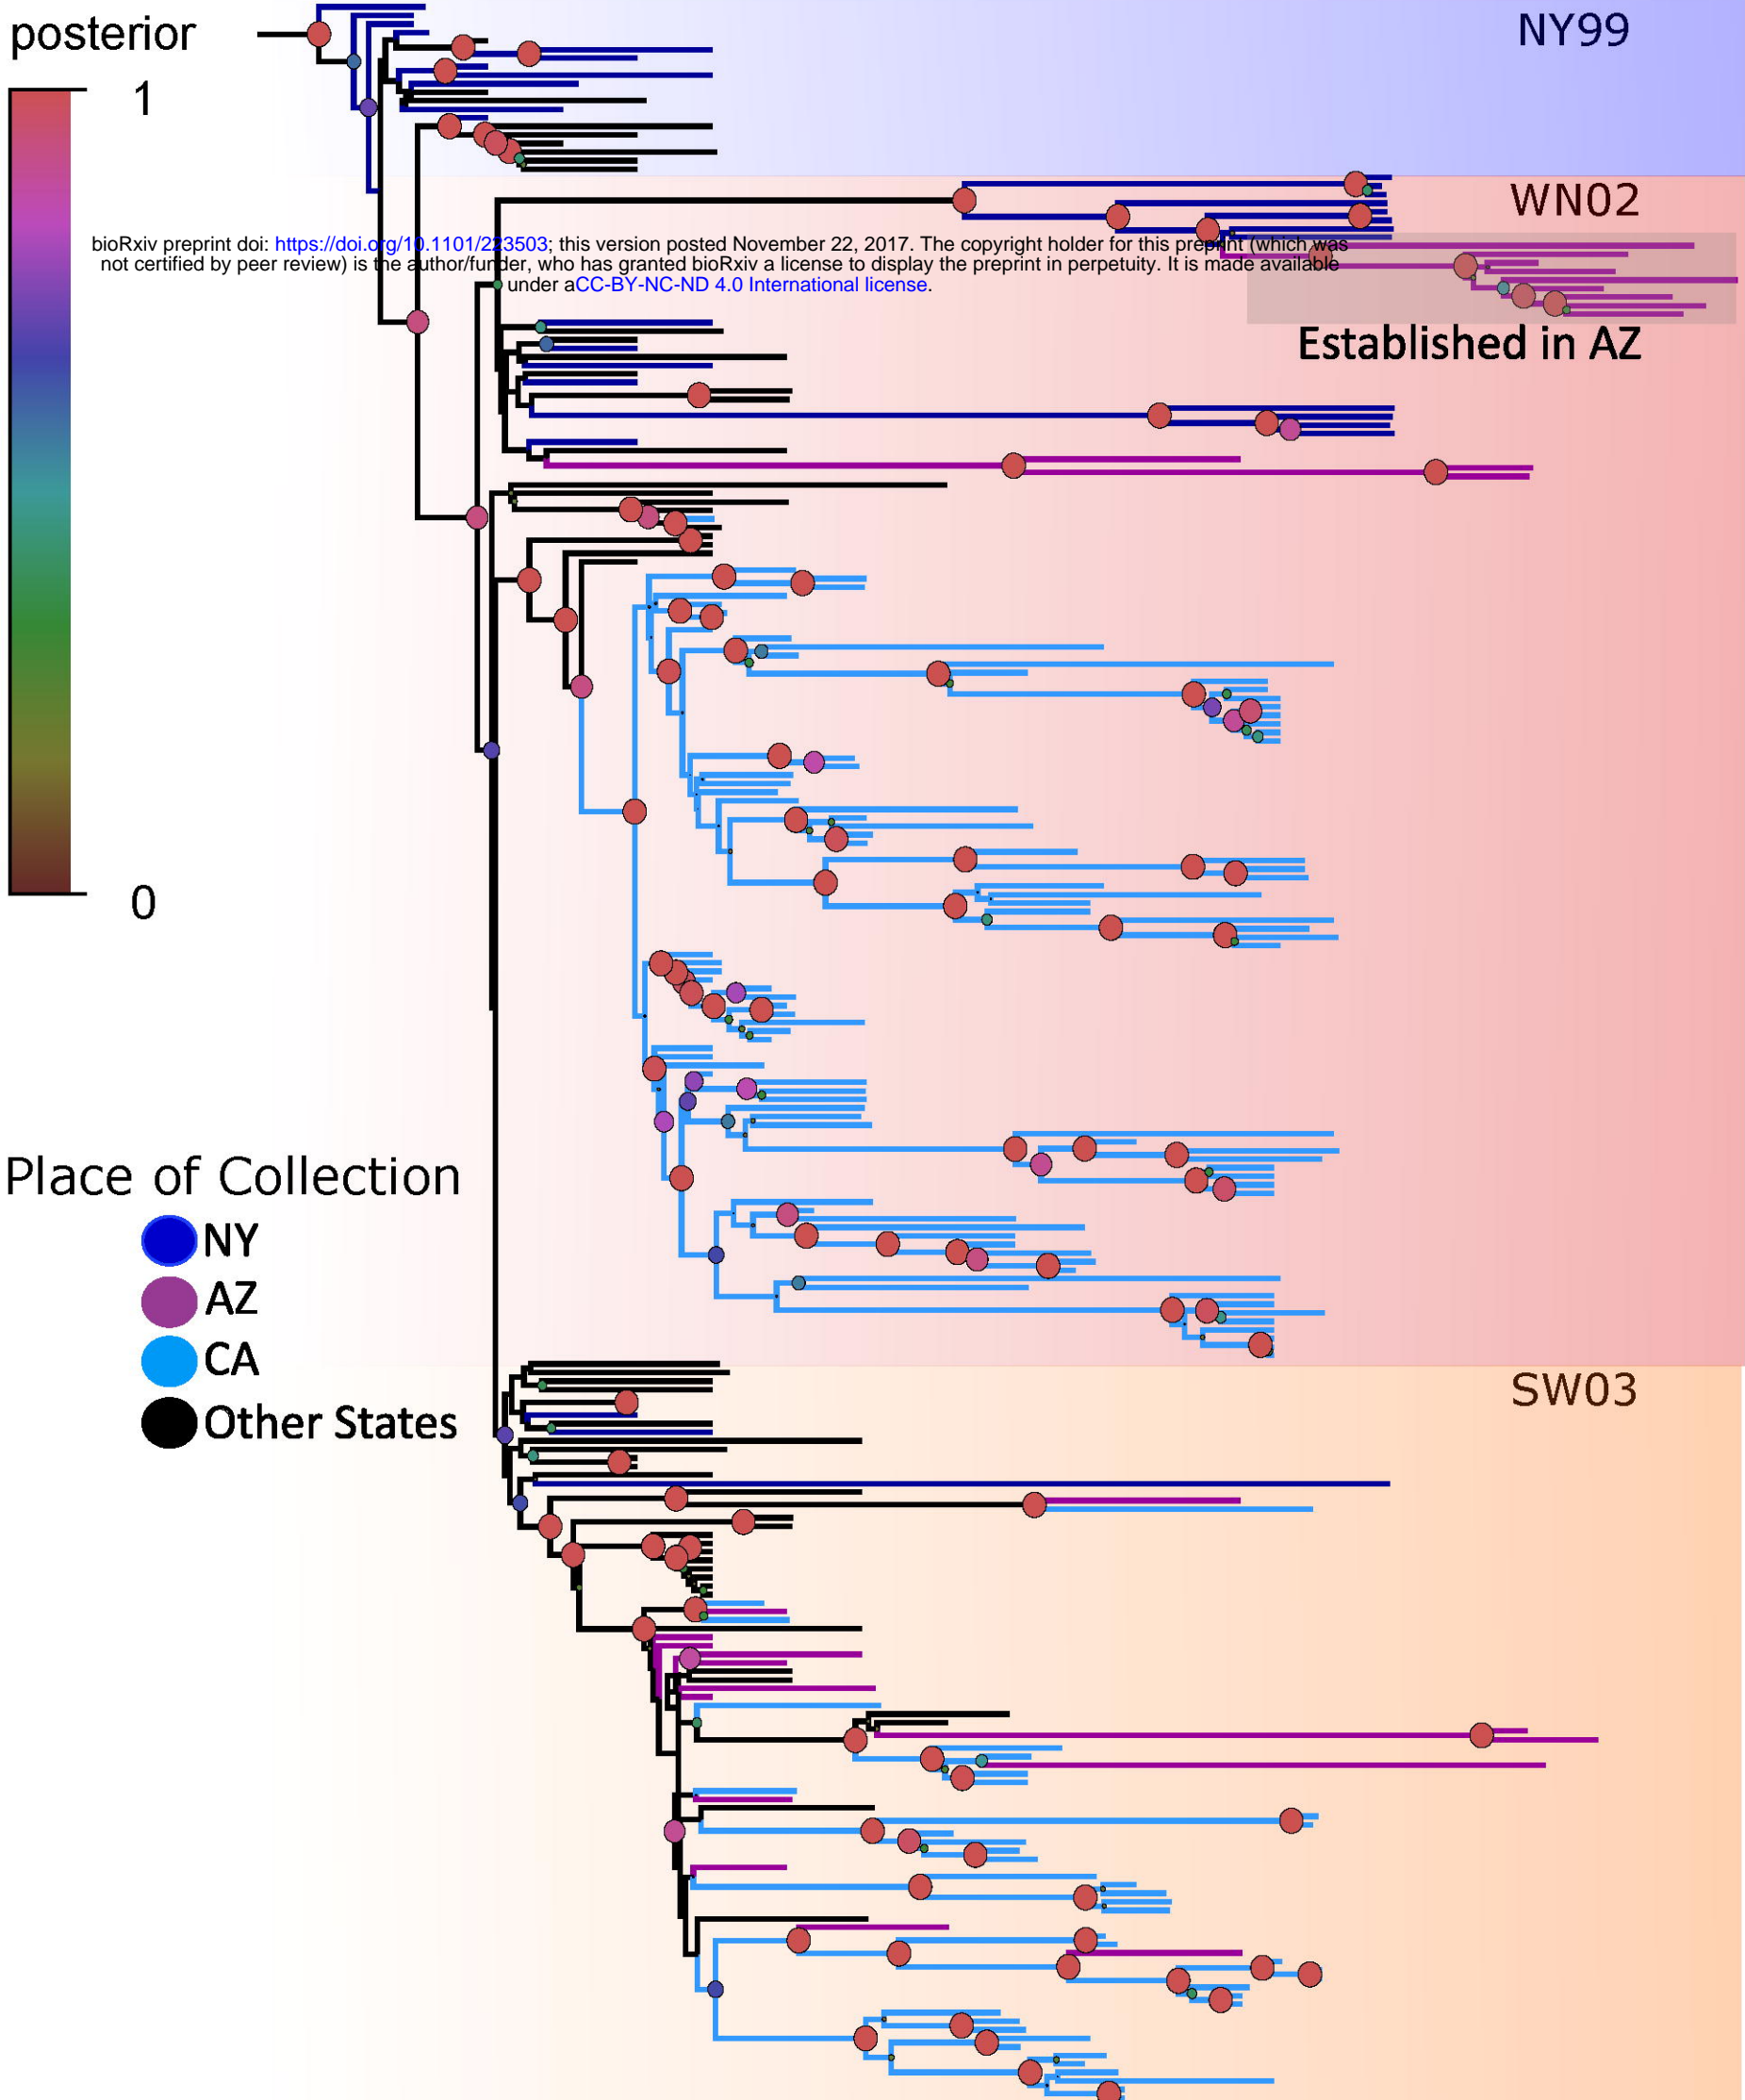

Temporal distribution of WNV and its vectors: 2016

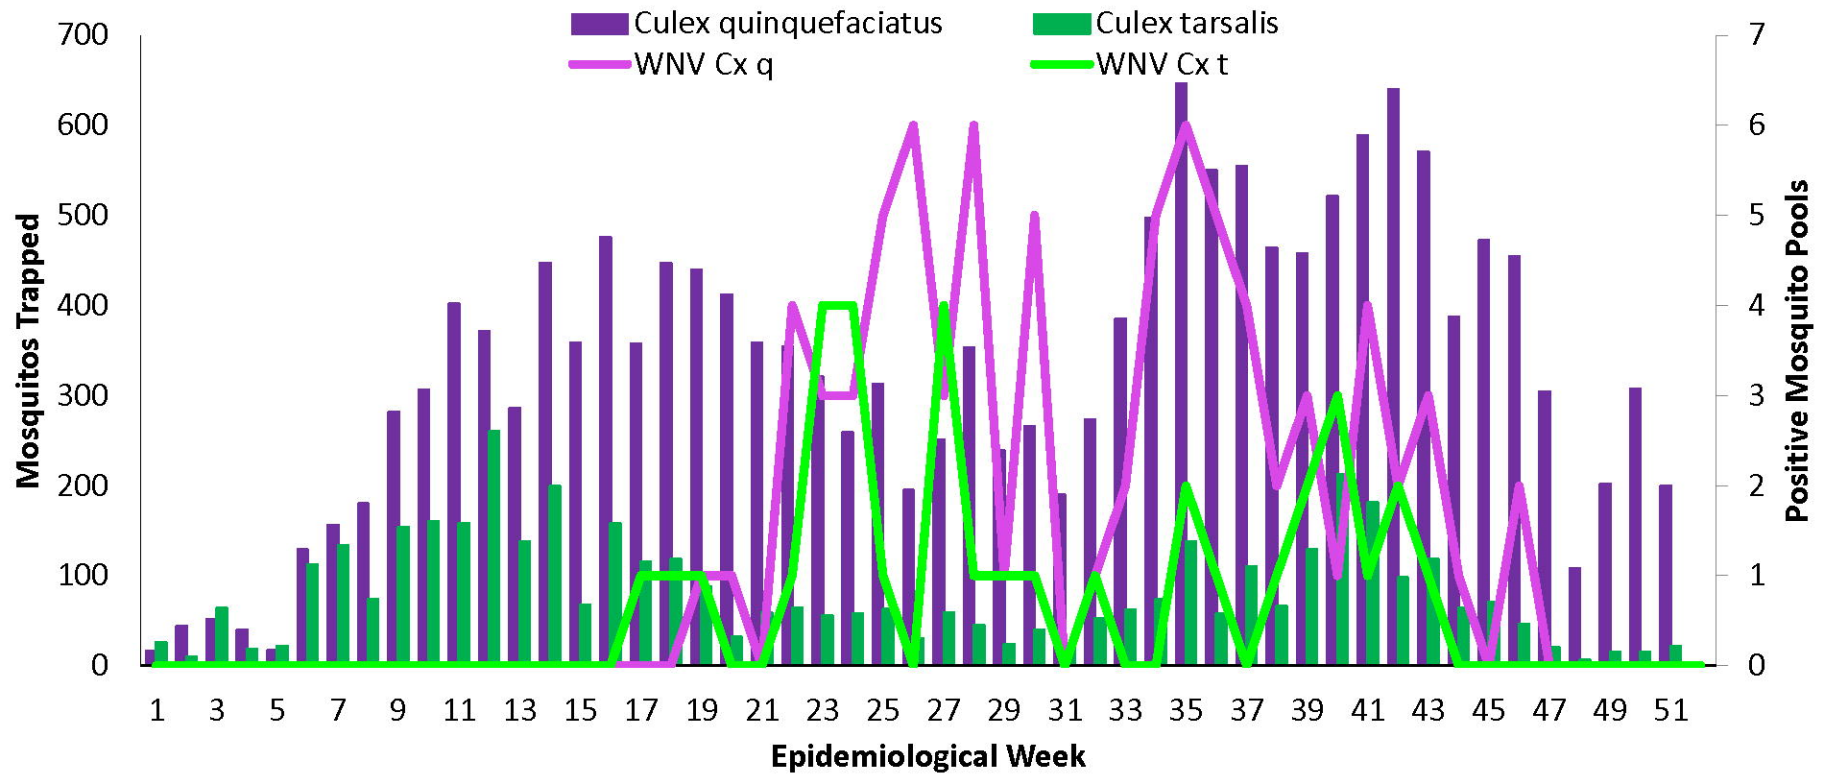

Source: https://www.biorxiv.org/content/biorxiv/early/2017/11/22/223503.full.pdf
